# Supplementary material for: Novel Imine-Tethering Cationic Surfactants: Synthesis, Surface Activity, and Investigation of the Corrosion Mitigation Impact on Carbon Steel in Acidic Chloride Medium via Various Techniques
Source: MDPI journal article supplement (doi:10.3390/molecules28114540), 2023-06-03
Supplement: s1 [file s1]

## **Supporting Information's**

# **Novel Imine-Tethering Cationic Surfactants: Synthesis, Surface Activity, and Investigation of the Corrosion Mitigation Impact on Carbon Steel in Acidic Chloride Medium via Various Techniques**

**Hany M. Abd El-Lateef <sup>1,2,\*</sup>, Ahmed H. Tantawy <sup>3,\*</sup>, Kamal A. Soliman <sup>3</sup>, Salah Eid <sup>3,4</sup> and Mohamed A. Abo-Riya <sup>3</sup>**

<sup>1</sup> Chemistry Department, College of Science, King Faisal University, Al-Ahsa 31982, Saudi Arabia

<sup>2</sup> Chemistry Department, Faculty of Science, Sohag University, Sohag 82534, Egypt

<sup>3</sup> Chemistry Department, Faculty of Science, Benha University, Benha 13518, Egypt;

kamal.soliman@fsc.bu.edu.eg (K.A.S.); eedsalah@yahoo.com (S.E.);

mohamed.aborya@fsc.bu.edu.eg (M.A.A.-R.)

<sup>4</sup> Chemistry Department, College of Science and Arts, Jof University, Alqurayat 77455, Saudi Arabia

\* Correspondence: hmahmed@kfu.edu.sa or hany\_shubra@science.sohag.edu.eg (H.M.A.E.-L.);

ahmed.tantawy@fsc.bu.edu.eg (A.H.T.)

## Contents

| Title                                                                                                                                                                         | Page |
|-------------------------------------------------------------------------------------------------------------------------------------------------------------------------------|------|
| Materials                                                                                                                                                                     | 3    |
| Figure S1. IR, <sup>1</sup> H, and <sup>13</sup> C NMR spectra of ((2-chlorobenzylidene)amino)-N,N-dimethyl-N-(2-oxo-2-(decyloxy)ethyl) propan-1- ammonium chloride [ICS-10]. | 4    |
| Table S1: The effects of the addition of various concentrations of ICS-10 and ICS-14 on the weight of carbon steel in 1.0 M HCl solution.                                     | 6    |
| Table S2: The inhibition capacity comparisons for some conventional Surfactants                                                                                               | 7    |

## Materials

The metal used is carbon steel (C-Steel) which has the following structure (wt./wt.%): 0.05 Ni, 0.02 Cr, 0.0256 Si, 1.81 Mn, 0.09 P, 0.1 C, 0.001 V, 0.01 Mo, 0.03 Cu, and the remainder is iron.

3-(*N, N* Dimethylamino)-1-propylamine (99%), 2-Chlorobenzaldehyde (97%), and Decyl (98%) were purchased from Acros organics Company (Belgium). Hexadecyl (97%) alcohol was attained from M/s S.D. Fine chemicals Pvt. Ltd (India) and tetrahydrofuran (99%) were obtained from Alnasr-chemical Company. Solvents (ethyl acetate, ethyl alcohol absolute (99%), and diethyl ether (99%)) were obtained from Algomhoria Chemical Co., Cairo, Egypt. All the utilized solvents and reagents were received without further purification.

**Figure S1.** IR,  $^1\text{H}$ , and  $^{13}\text{C}$  NMR spectra of ((2-chlorobenzylidene)amino)-*N,N*-dimethyl-*N*-(2-oxo-2-(decyloxy)ethyl) propan-1- ammonium chloride [ICS-10].

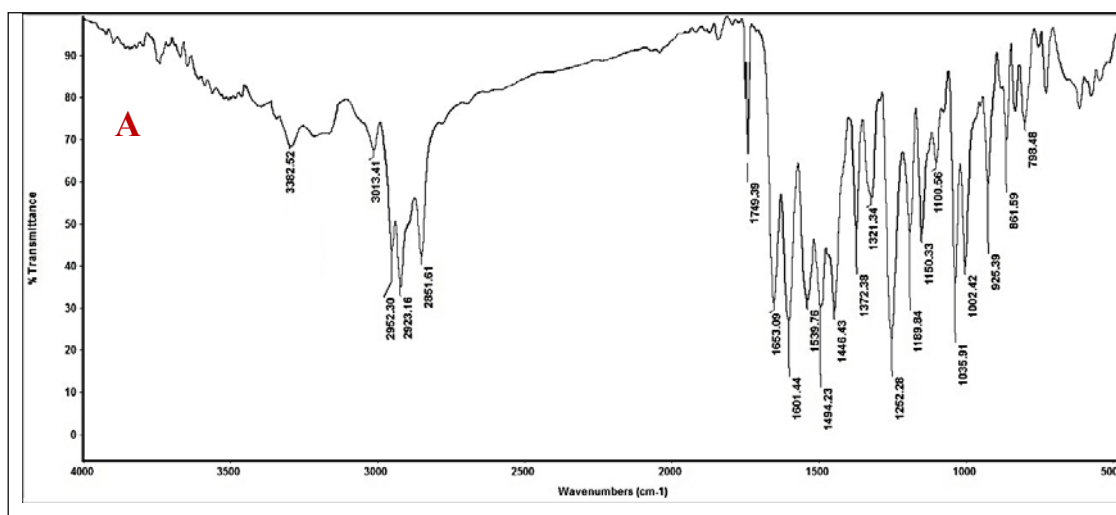

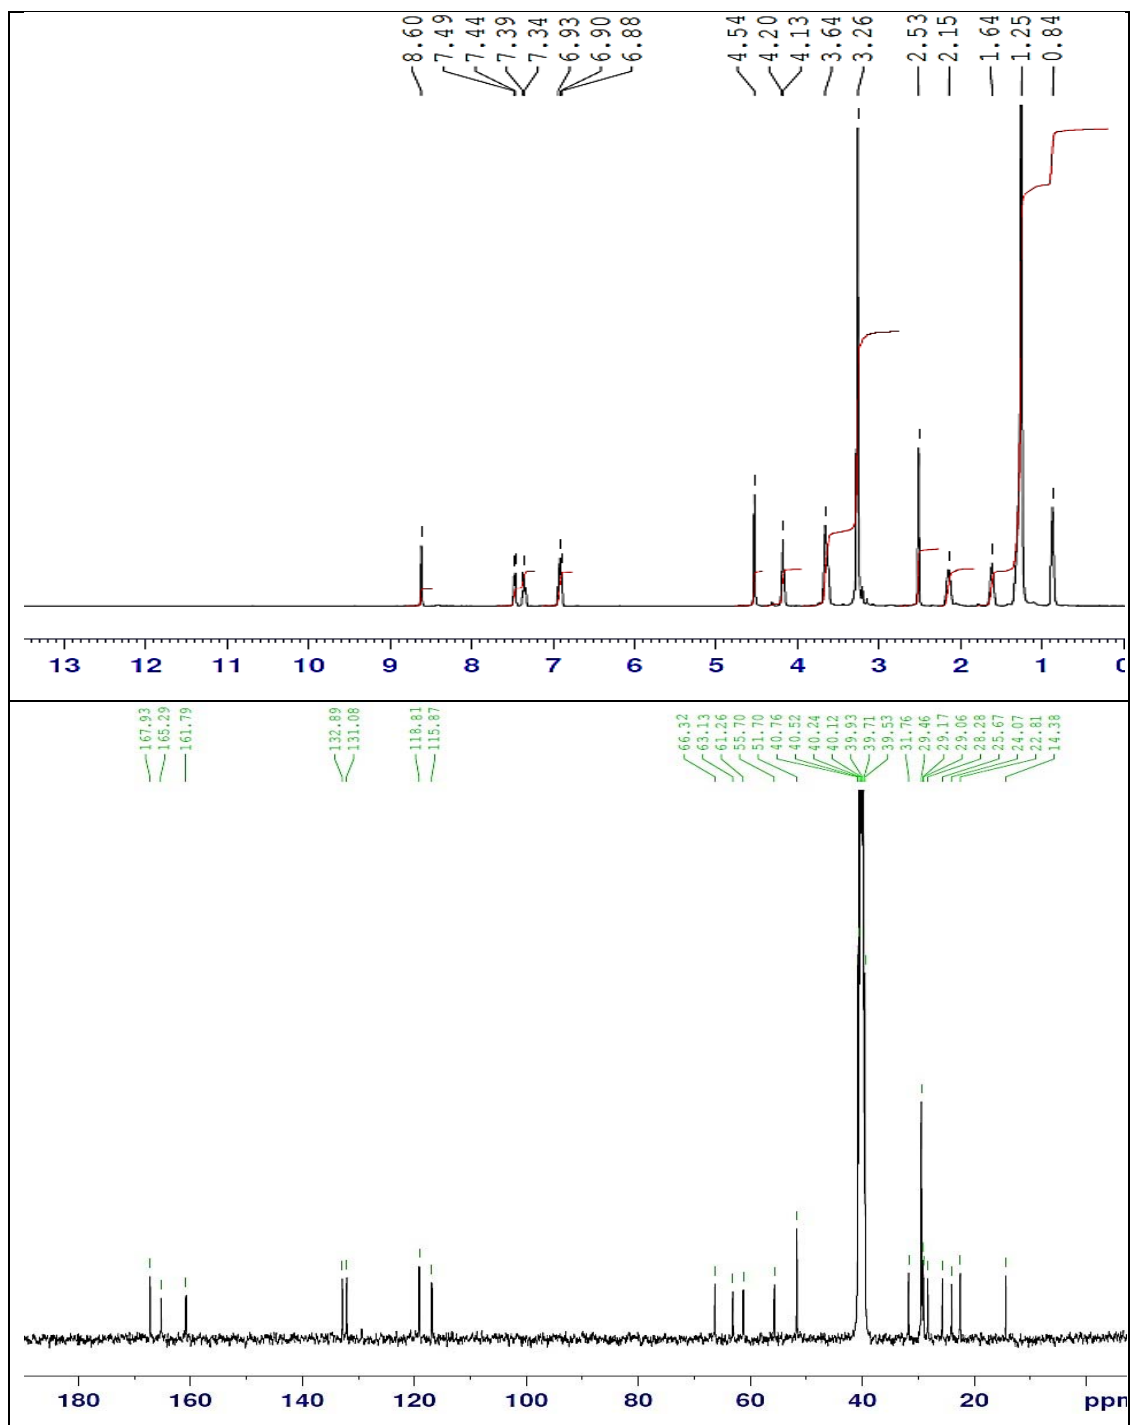

**Table S1:** The effects of the addition of various concentrations of ICS-10 and ICS-14 on the weight of carbon steel in 1.0 M HCl solution.

| Inhibitor code | Inh. Conc.<br>(M)  | Weight loss<br>(gm) | $\theta$ | <i>I.E./%</i> |
|----------------|--------------------|---------------------|----------|---------------|
| -              | 0                  | 0.137               | -        | -             |
| <b>ICS-10</b>  | $5 \times 10^{-6}$ | 0.070               | 0.4891   | 48.91         |
|                | $1 \times 10^{-5}$ | 0.049               | 0.6423   | 64.23         |
|                | $5 \times 10^{-5}$ | 0.027               | 0.8029   | 80.29         |
|                | $1 \times 10^{-4}$ | 0.019               | 0.860    | 86.00         |
|                | $5 \times 10^{-4}$ | 0.012               | 0.9113   | 91.13         |
| <b>ICS-14</b>  | $5 \times 10^{-6}$ | 0.053               | 0.6131   | 61.31         |
|                | $1 \times 10^{-5}$ | 0.040               | 0.7080   | 70.80         |
|                | $5 \times 10^{-5}$ | 0.018               | 0.8686   | 86.86         |
|                | $1 \times 10^{-4}$ | 0.014               | 0.8978   | 89.78         |
|                | $5 \times 10^{-4}$ | 0.008               | 0.9416   | 94.16         |



**Table S2:** The inhibition capacity comparisons for some conventional Surfactants

| <b>Inhibitor type</b>                                                                                     | <b>Corrosive medium</b> | <b>Inhibitor concentration</b> | <b>Substrate type</b> | <b>Inhibition capacity / %</b> | <b>Reference</b>     |
|-----------------------------------------------------------------------------------------------------------|-------------------------|--------------------------------|-----------------------|--------------------------------|----------------------|
| <b>ICS-10</b>                                                                                             | 1 M HCl                 | 0.5 mM                         | C- steel              | ~92                            | <b>Current study</b> |
| <b>ICS-14</b>                                                                                             | 1 M HCl                 | 0.5 mM                         | C- steel              | ~ 95                           | <b>Current study</b> |
| 4-Diethyl Amino Benzaldehyde Schiff base cationic                                                         | 2N HCl                  | 200 ppm                        | C- steel              | ~94                            | [1]                  |
| Cetyl trimethyl ammonium bromide                                                                          | 0.5 M HCl               | 200 ppm                        | Mild-steel            | ~ 86.5                         | [2]                  |
| dodecyl trimethyl ammonium chloride                                                                       | 0.5 M HCl               | 200 ppm                        | Mild-steel            | ~ 87.1                         | [2]                  |
| 3-((2-hydroxybenzylidene)amino)-N,N-dimethyl-N-(2-oxo-2-(decyloxy)ethyl) propan-1-ammonium chloride       | 3.5%NaCl +0.5 M HCl     | 150 ppm                        | Carbon Steel          | ~ 88.88                        | [3]                  |
| 3-((2-hydroxybenzylidene)amino)-N,N-dimethyl-N-(2-oxo-2-(tetradecyloxy) ethyl) propan-1-ammonium chloride | 3.5%NaCl +0.5 M HCl     | 150 ppm                        | Carbon Steel          | ~ 93.80                        | [3]                  |
| Quaternary ammonium surfactants                                                                           | 1.0 M HCl               | 720 ppm                        | C-steel               | ~ 85.0                         | [4]                  |



## References

- 1 Negm, N.A.; Zaki, M.F.; Salem, M.A.I. Synthesis and Evaluation of 4-Diethyl Amino Benzaldehyde Schiff Base Cationic Amphiphiles as Corrosion Inhibitors for Carbon Steel in Different Acidic Media. *J. Surfact. Deterg.* **2009**, *12*, 321–329. <https://doi.org/10.1007/s11743-009-1156-0>.
- 2 Fouda, A.S.; Elewady, Y.A.; Abd El-Aziz, H.K.; Ahmed, A.M. Corrosion Inhibition of Carbon Steel in 0.5 M HCl Solution Using Cationic Surfactants. *Int. J. Electrochem. Sci.* **2012**, *7*, 10456–10475. <http://www.electrochemsci.org/papers/vol7/71110456.pdf>.
- 3 Abd El-Lateef, H.M.; Tantawy, A.H. Synthesis and evaluation of novel series of Schiff base cationic surfactants as corrosion inhibitors for carbon steel in acidic/chloride media: Experimental and theoretical investigations. *RSC Adv.* **2016**, *6*, 8681–8700. <https://doi.org/10.1039/C5RA21626E>.
- 4 Hamitouche, H.; Khelifa, A.; Kouache, A.; Moulay, S. Petroleum quaternary ammonium surfactants mixture synthesized from light naphtha as corrosion inhibitors for carbon steel in 1 m HCl. *Corros. Rev.* **2013**, *31*, 61. <https://doi.org/10.1515/corrrev-2012-0022>.
